# Supplementary material for: A novel ternary MQDs/NCDs/TiO2 nanocomposite that collaborates with activated persulfate for efficient RhB degradation under visible light irradiation
Source: Royal Society of Chemistry journal article supplement (doi:10.1039/d0nj05640e), 2020-12-10
Supplement: d0nj05640e1.pdf [file d0nj05640e1.pdf]

## Supplementary Information

### A novel ternary MQDs/NCDs/TiO<sub>2</sub> nanocomposite collaborated with activated persulfate for efficient RhB degradation under visible light irradiation

Qian Zhang <sup>a</sup>, Han Zhao <sup>a</sup>, Yuming Dong <sup>a</sup>, Xiangmiao Zhu <sup>a</sup>, Xiang Liu <sup>a\*</sup>, Hexing Li <sup>b\*</sup>

<sup>a</sup> Key Laboratory of Synthetic and Biological Colloids, Ministry of Education, School of Chemical and Material Engineering, Jiangnan University, Wuxi 214122, P. R. China

<sup>b</sup> The Key Laboratory of the Chinese Ministry of Education in Resource Chemistry, Shanghai Normal University, Shanghai 200234, P. R. China

### Content

|                                                                                                                                       |    |
|---------------------------------------------------------------------------------------------------------------------------------------|----|
| <b>Content 1.</b> Thermogravimetric analysis of as-prepared NCDs/TiO <sub>2</sub> .....                                               | S1 |
| <b>Content 2.</b> Exploration of optimum loading amount of quantum dots on MQDs/NCDs/TiO <sub>2</sub> nanocomposites .....            | S2 |
| <b>Content 3.</b> The morphology of NCDs and MQDs .....                                                                               | S3 |
| <b>Content 4.</b> The energy dispersive spectroscopy pattern and elements mapping of as-prepared sample .....                         | S4 |
| <b>Content 5.</b> The specific surface area, average pore size and pore volume of three samples.....                                  | S5 |
| <b>Content 6.</b> Comparison of photocatalytic performance for MQDs/NCDs/TiO <sub>2</sub> nanocomposites with similar materials ..... | S6 |
| <b>Content 7.</b> Band-gap energy and Valence-band XPS spectra of NCDs ....                                                           | S7 |

## 22 Content 1. Thermogravimetric analysis of as-prepared NCDs/TiO<sub>2</sub>

23 Thermogravimetric analysis (TGA) was used to determine the amount of NCDs  
24 loaded on TiO<sub>2</sub> nanosheets. As shown in the Fig.S1, the 5.93% weight loss in pure TiO<sub>2</sub>  
25 was mainly ascribed to the evaporation of adsorbed water, the decomposition of  
26 surface-attached water, -OH group and remaining organic compound, while more  
27 weight loss observed in NCDs/TiO<sub>2</sub> nanocomposites could result from the combustion  
28 of NCDs. As a result, the mass percentage of NCDs in as-prepared three samples was  
29 1.05%, 1.48% and 1.96%, respectively.

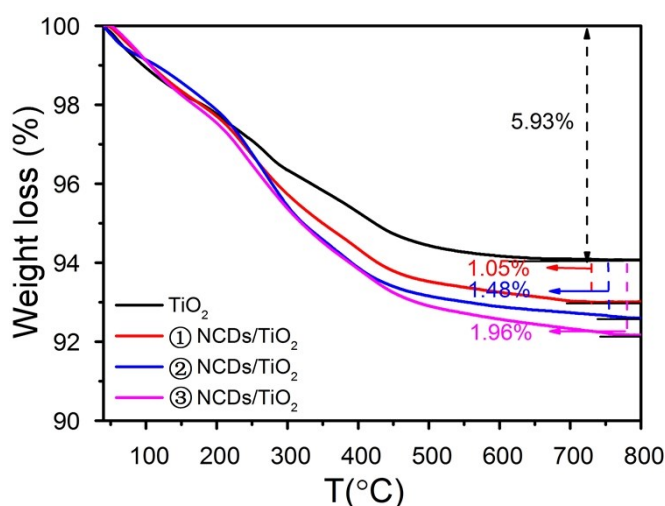

30

31 **Fig. S1** TGA curves of TiO<sub>2</sub> nanosheets and NCDs/TiO<sub>2</sub> with different NCDs content.

32

33

## 34 Content 2. Exploration of optimum loading amount of quantum dots 35 on MQDs/NCDs/TiO<sub>2</sub> nanocomposites

36 During the synthesis process of MQDs/NCDs/TiO<sub>2</sub> nanocomposites, NCDs were first

37 loaded on TiO<sub>2</sub> nanosheets. The photocatalytic activity of NCDs/TiO<sub>2</sub> with different  
38 amounts of NCDs was evaluated toward RhB degradation to find the optimum content  
39 of NCDs. The change tendency of degradation rate of RhB over NCDs/TiO<sub>2</sub>  
40 nanocomposites are shown in Fig. S2a and 1.5%NCDs/TiO<sub>2</sub> displays the highest  
41 catalytic degradation activity. The decrease of photocatalytic activity with further  
42 increasing of NCDs amount is probably because excessive NCDs will partially become  
43 the recombination center of photogenerated electron-holes, which is disadvantageous to  
44 photocatalytic degradation. On this basis, different amount of MQDs was further loaded  
45 on 1.5%NCDs/TiO<sub>2</sub> nanocomposites. Similarly, the photocatalytic performance of  
46 MQDS/NCDs/TiO<sub>2</sub> increases at first with the increase of MQDs content (Fig. S2b).  
47 When the loading of MQDs was 1.5%, 1.5%MQDs/1.5%NCDs/TiO<sub>2</sub> exhibited the  
48 highest photocatalytic activity. However, further increasing amount of MQDs brings  
49 about a decrease of photocatalytic activity. This result may be ascribed to the shielding  
50 effect of overcharged MQDs which will hinder the light absorption of NCDs/TiO<sub>2</sub>.

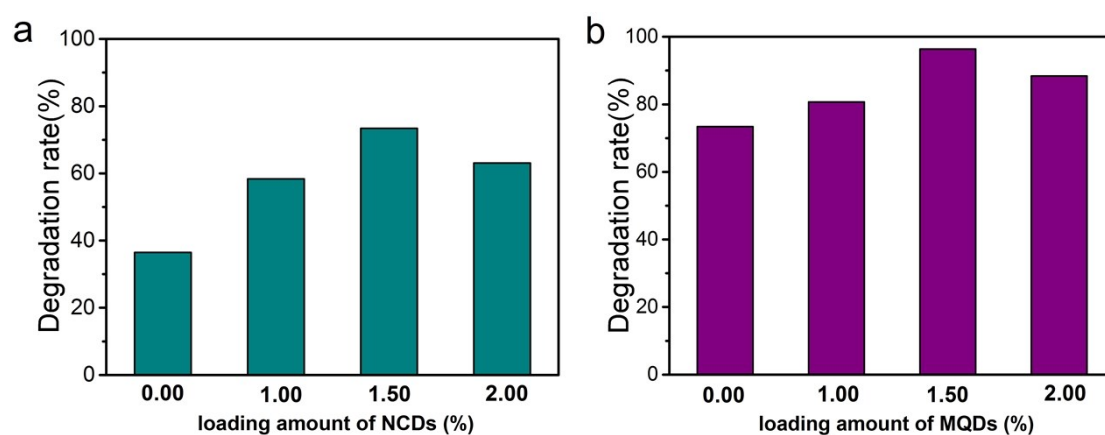

51

52 **Fig. S2** (a) The degradation rate of RhB by NCDs/TiO<sub>2</sub> nanocomposites loaded with different  
53 amounts of NCDs, (b) the degradation rate of RhB by MQDs/NCDs/TiO<sub>2</sub> nanocomposites loaded  
54 with 1.5% NCDs and different amounts of MQDs.

55 **Content 3. The HRTEM image of NCDs and MQDs**

56 The HRTEM image of NCDs and MQDs is shown in Fig. S3a and Fig. S3b,  
57 respectively. It can be observed that NCDs and MQDs are both spherical and with the  
58 dimensions less than 10 nm.

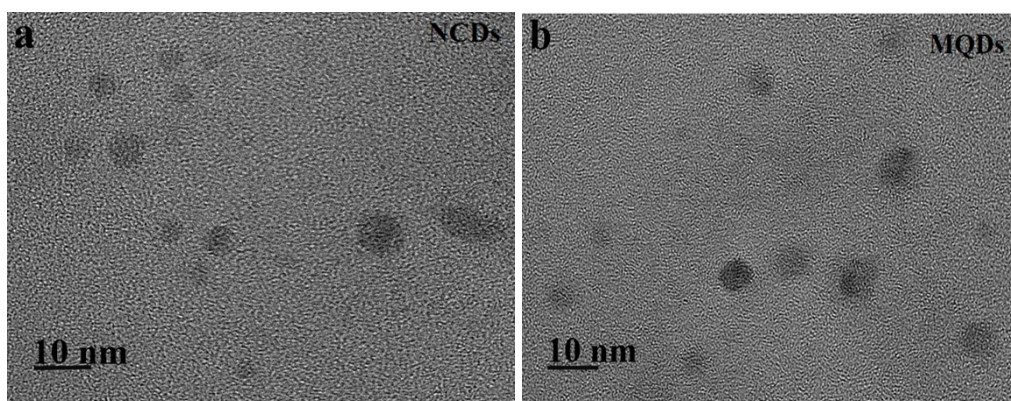

60 **Fig. S3** HRTEM image of (a) NCDs and (b) MQDs samples.

61

62

63 **Content 4. The energy dispersive spectroscopy pattern and elements**  
64 **mapping of as-prepared sample**

65 The energy dispersive spectroscopy (EDS) pattern and elements mapping of sample  
66 shows that the six elements of Ti, C, N, O, Mo and S were dispersed in  
67 MQDs/NCDs/TiO<sub>2</sub> nanocomposites, which further demonstrates that NCDs and MQDs  
68 were well distributed on TiO<sub>2</sub> nanosheets.

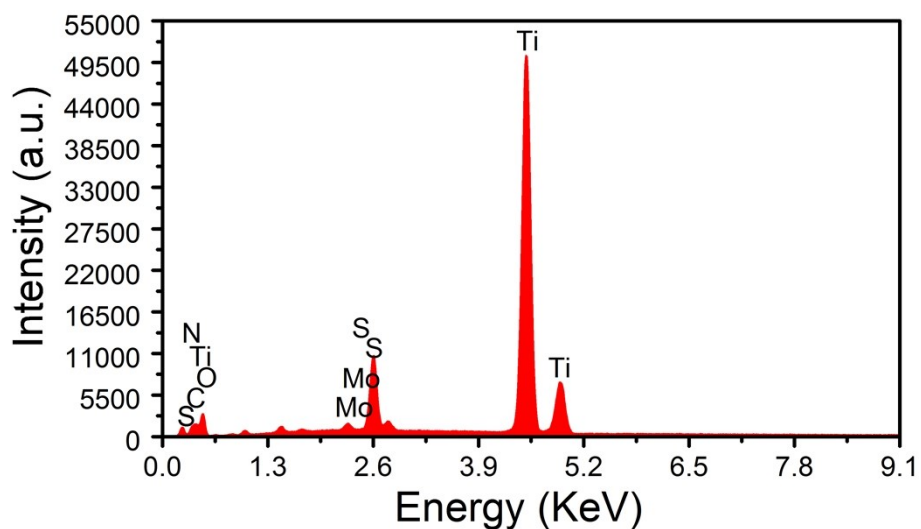

69

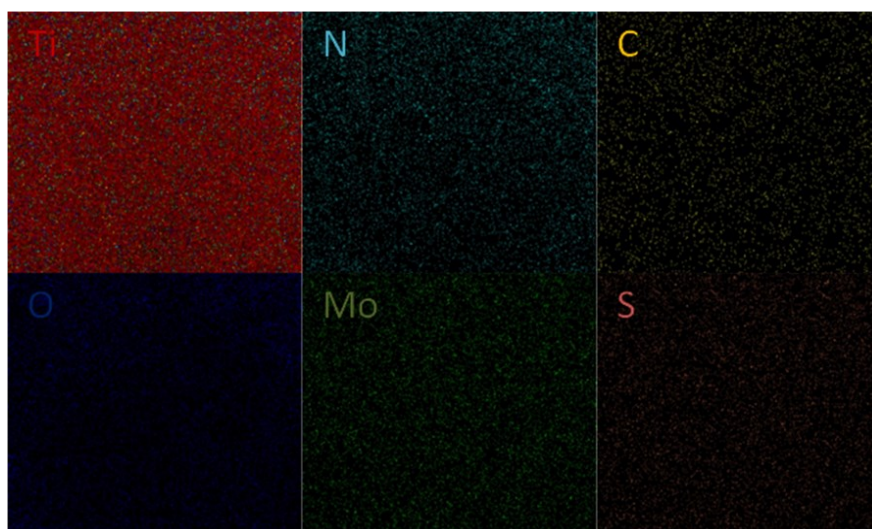

70

71 **Fig. S4** EDS pattern of MQDs/NCDs/TiO<sub>2</sub> nanocomposites and the corresponding elements mapping  
 72 for Ti, N, C, O, Mo, and S.

73

74

75 **Content 5. The specific surface area, average pore size and pore**  
 76 **volume of three samples**

77 The specific surface area, average pore size and pore volume of three samples were  
 78 listed in Table S1.

79 **Table S1** Summary of specific surface area, average pore size and pore volume of TiO<sub>2</sub>, NCDs/TiO<sub>2</sub>  
80 and MQDs/NCDs/TiO<sub>2</sub> samples.

| Samples                    | Specific surface area<br>(m <sup>2</sup> /g) | Average pore size<br>(nm) | Pore volume<br>(cm <sup>3</sup> /g) |
|----------------------------|----------------------------------------------|---------------------------|-------------------------------------|
| TiO <sub>2</sub>           | 126.13                                       | 17.87                     | 0.049                               |
| NCDs/TiO <sub>2</sub>      | 116.71                                       | 17.01                     | 0.045                               |
| MQDs/NCDs/TiO <sub>2</sub> | 101.48                                       | 16.29                     | 0.039                               |

81

82

## 83 **Content 6. Comparison of photocatalytic performance for** 84 **MQDs/NCDs/TiO<sub>2</sub> nanocomposites with similar materials**

85 In this work, we compared nanocomposites with previously reported TiO<sub>2</sub>-based  
86 photocatalyst and the results listed in Table S2. The photocatalytic performance can be  
87 influenced by some factors, such as the power of light source, the dose of catalysts and  
88 pollutants, degradation time and so on. Compared with first three photocatalysts in  
89 Table S2, the degradation efficiency of MQDs/NCDs/TiO<sub>2</sub> are the highest. Although the  
90 degradation efficiency of MQDs/NCDs/TiO<sub>2</sub> is slightly lower than that of the latter two  
91 catalysts, the degradation time and the power of light source are quite short and low.  
92 Thus, the MQDs/NCDs/TiO<sub>2</sub> nanocomposites exhibit excellent photocatalytic activity  
93 even without persulfate addition under visible light.

94 **Table S2** Comparison of photocatalytic performance for MQDs/NCDs/TiO<sub>2</sub> nanocomposites with  
95 similar materials

| Photocatalysts                                                                      | Light source            | Pollutant                        | Degradation time (min) | Degradation efficiency | Ref          |
|-------------------------------------------------------------------------------------|-------------------------|----------------------------------|------------------------|------------------------|--------------|
| CQDs/Fe <sub>2</sub> O <sub>3</sub> /TiO <sub>2</sub><br>(50 mg)                    | Xe lamp<br>(300 W)      | MB ( 100 mL, 20<br>mg/L)         | 180                    | 86.5 %                 | S1           |
| CQDs/TiO <sub>2</sub> / g-C <sub>3</sub> N <sub>4</sub><br>(50 mg)                  | Xe lamp<br>(350 W)      | Enrofloxacin ( 50<br>mL, 4 mg/L) | 60                     | 91.6 %                 | S2           |
| MQDs/graphene/ TiO <sub>2</sub><br>(40 mg)                                          | Xe lamp<br>(150 W)      | RhB ( 80 mL, 10<br>mg/L)         | 80                     | 80 %                   | S3           |
| MoS <sub>2</sub> /TiO <sub>2</sub> /HMFs<br>(400 mg)                                | Halogen lamp<br>(500 W) | RhB ( 32 mL, 20<br>mg/L)         | 140                    | 98.7 %                 | S4           |
| C-Dots/Ag <sub>6</sub> Si <sub>2</sub> O <sub>7</sub> /TiO <sub>2</sub><br>(100 mg) | LED lamp<br>(300 W)     | RhB (250<br>mL, 8 mg/L)          | 120                    | 99.8 %                 | S5           |
| MQDs/NCDs/TiO <sub>2</sub><br>(100 mg)                                              | Xe lamp<br>(150 W)      | RhB ( 100 mL,<br>10 mg/L)        | 80                     | 96.4 %                 | This<br>work |

## 96 Reference:

- 97 S1. J. Zhang, M. Kuang, J. Wang, R. Liu, S. Xie, Z. Ji, Fabrication of carbon quantum  
98 dots/TiO<sub>2</sub>/Fe<sub>2</sub>O<sub>3</sub> composites and enhancement of photocatalytic activity under visible light. *Chem.*  
99 *Phys. Lett.*, 2019, **730**, 391-398.
- 100 S2. Y. Su, P. Chen, F. Wang, Q. Zhang, T. Chen, Y. Wang, K. Yao, W. Lv and G. Liu, Decoration  
101 of TiO<sub>2</sub>/g-C<sub>3</sub>N<sub>4</sub> Z-scheme by carbon dots as a novel photocatalyst with improved visible-light  
102 photocatalytic performance for the degradation of enrofloxacin. *RSC Adv.*, 2017, **7**, 34096-34103.
- 103 S3. W. Gao, M. Wang, C. Ran and L. Li, Facile one-pot synthesis of MoS<sub>2</sub> quantum dots-graphene-  
104 TiO<sub>2</sub> composites for highly enhanced photocatalytic properties. *Chem. Commun.*, 2015, **51**, 1709-  
105 1712.
- 106 S4. Y. Yu, J. Wan, Z. Yang and Z. Hu, Preparation of the MoS<sub>2</sub>/TiO<sub>2</sub>/HMFs ternary composite  
107 hollow microfibres with enhanced photocatalytic performance under visible light. *J. Colloid Interf.*  
108 *Sci.*, 2017, **502**, 100–111.
- 109 S5. S. Feizpoor, A. Habibi-Yangjeh, D. Seifzadeh, S. Ghosh, Combining carbon dots and Ag<sub>6</sub>Si<sub>2</sub>O<sub>7</sub>  
110 nanoparticles with TiO<sub>2</sub>: Visible-light-driven photocatalysts with efficient performance for removal  
111 of pollutants. *Sep. Purif. Technol.*, 2020, **248**, 116928-116938.

112

## 113 Content 7. Band-gap energy and Valence-band XPS spectra of NCDs

114 The band-gap and LUMO position of NCDs was determined from the plots of  
115  $(\alpha h\nu)^{1/2}$  versus band-gap energy and valence-band XPS spectrum. As shown in Fig. S5a  
116 and Fig. S5b, the band-gap of NCDs is about 1.78 eV and the HOMO position is at 0.31  
117 eV. Based on this, the LUMO position can be calculated to be -1.47 eV.

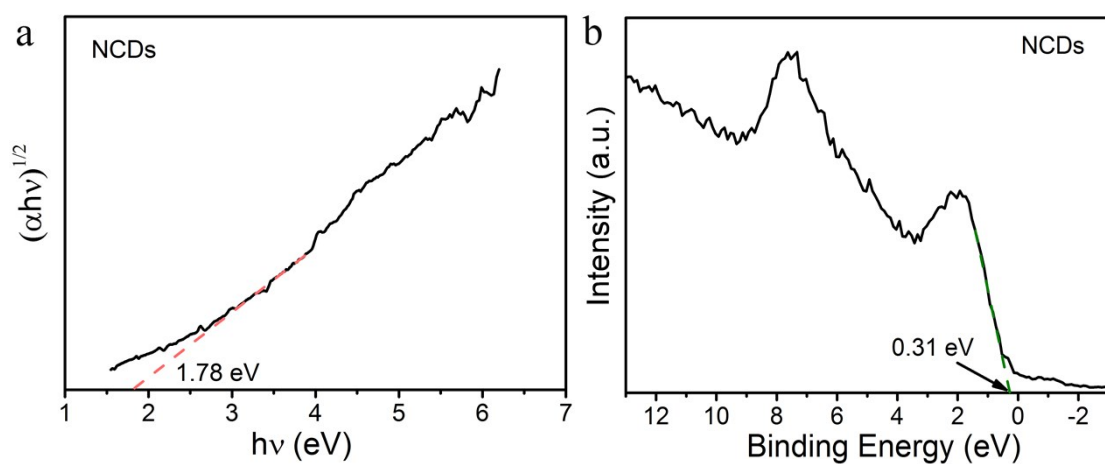

118  
119 Fig. S5 (a) Band-gap energy and (b) valence-band XPS spectrum of NCDs

120
